# Supplementary material for: Increased phenanthrene toxicity to Eisenia fetida upon co-exposure to o-xylene
Source: Royal Society of Chemistry journal article supplement (doi:10.1039/d4em00726c), 2025-01-01
Supplement: d4em00726c1.pdf [file d4em00726c1.pdf]

## Supplementary Material

**Title:**

Increased phenanthrene toxicity to *Eisenia fetida* upon co-exposure to o-xylene

**Authors:**

Guofeng Li<sup>a,b</sup>, Zhongran Wu<sup>a,b</sup>, Haifeng Chi<sup>a,b</sup>, Shanna Lin<sup>a</sup>, Chao Cai<sup>a,\*</sup>

**Address:**

a. State Key Laboratory for Ecological Security of Regions and Cities, Institute of Urban

Environment, Chinese Academy of Sciences, Xiamen 361021, China

b. University of Chinese Academy of Sciences, Beijing 100049, China

**\*Corresponding author:**

No. 1799 Jimei Road, Jimei District, Xiamen, Fujian, 361021, P. R. China.

E-Mail: [ccai@iue.ac.cn](mailto:ccai@iue.ac.cn)

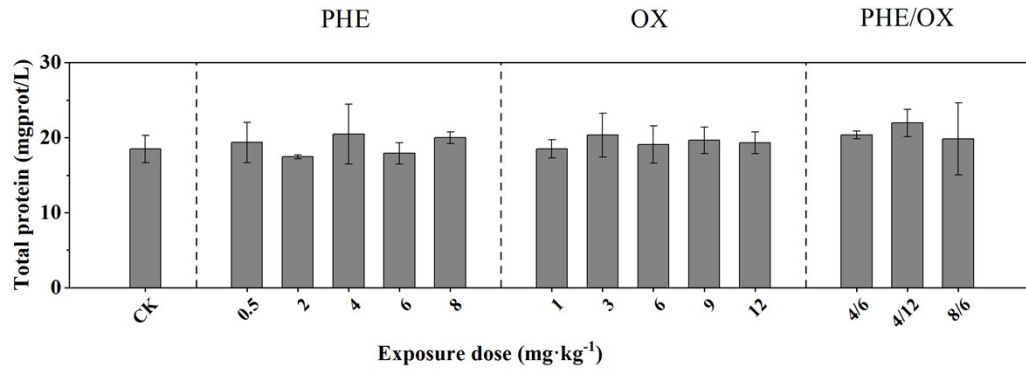

**Figure.S1** Total protein contents in the *Eisenia fetida* exposed for 28 days to single and combined polluted soils. Values are the mean  $\pm$  SD, n=3. \* and \*\* indicate significant differences compared with the control at  $P < 0.05$  and  $P < 0.01$ , respectively, by the *Student's* t-test.

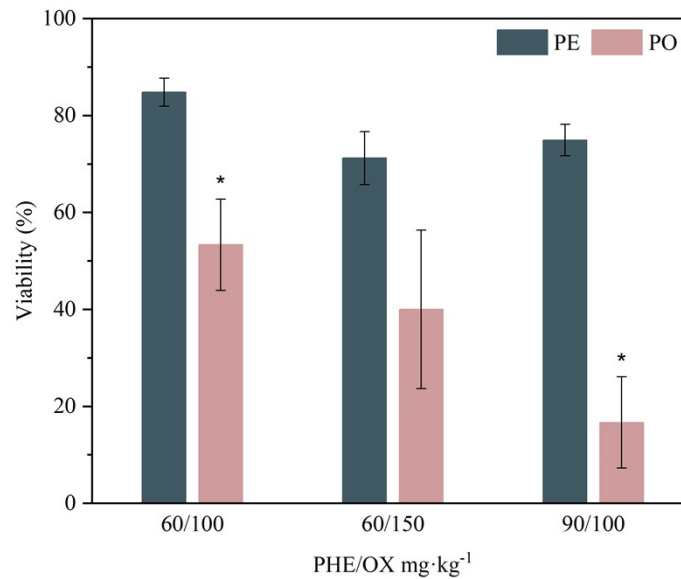

**Figure.S2** Comparison between the predicted effects (PE) and the observed effects (PO) of the mixtures on the livability of earthworms after 48 h exposure (error bars =  $\pm$ SE, n = 25 in PE and n = 5 in PO). \* indicate significant differences between PE and PO at  $P < 0.05$ , by the *Student's* t-test.

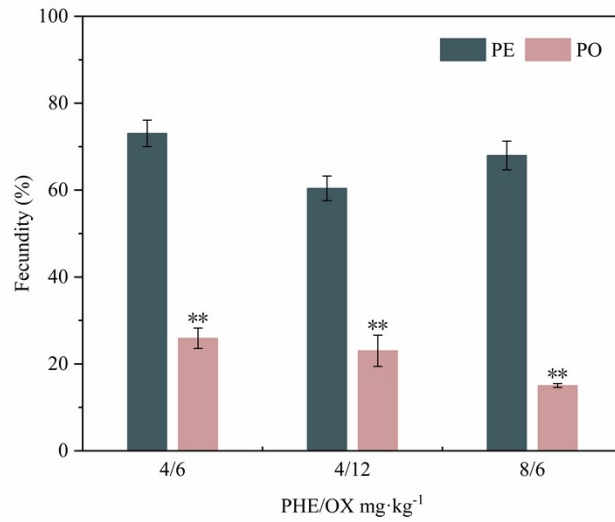

**Figure.S3** Comparison between the predicted effects (PE) and the observed effects (PO) of the mixtures on the fecundity of earthworms (error bars =  $\pm$ SE,  $n = 9$  in PE and  $n = 3$  in PO). \*\* indicate significant differences between PE and PO at  $P < 0.01$ , by the *Student's t*-test.

**Table.S1** Summary of the calculated parameters for the acute toxicity of PHE and OX to earthworms (*Eisenia fetida*) in 24 h and 48 h exposure treatments.

| Test substance | 24 h                                       |          |                                       |  | 48 h                                       |          |                                      |  |
|----------------|--------------------------------------------|----------|---------------------------------------|--|--------------------------------------------|----------|--------------------------------------|--|
|                | LC <sub>50</sub><br>(mg·kg <sup>-1</sup> ) | (95% CI) | Fitting equation                      |  | LC <sub>50</sub><br>(mg·kg <sup>-1</sup> ) | (95% CI) | Fitting equation                     |  |
| PHE            | 109<br>(76.1-141)                          |          | y=0.50x-4.86<br>R <sup>2</sup> =0.97  |  | 71.6<br>(55.7-87.6)                        |          | y=0.70x+0.19<br>R <sup>2</sup> =0.99 |  |
| OX             | 174<br>(70.0-277)                          |          | y=0.37x-14.29<br>R <sup>2</sup> =0.91 |  | 121<br>(53.6-188)                          |          | y=0.46x-5.43<br>R <sup>2</sup> =0.96 |  |

r: the parameter was obtained from Pearson correlation analysis, performed using SPSS software (\*p < 0.05, \*\*p < 0.01)
